1     **Reproductive Isolation through Experimental Manipulation of Sexually**  
2     **Antagonistic Coevolution in *Drosophila Melanogaster***

3     Syed Zeeshan Ali<sup>1</sup>

4     Martik Chatterjee<sup>1#</sup>

5     Manas Arun Samant<sup>1#</sup>

6     Nagaraj Guru Prasad<sup>1\*</sup>

7

8     Present Address:

9     <sup>1</sup>Indian Institute of Science Education and Research Mohali,

10    Knowledge City, Sector 81, SAS Nagar, PO Manauli, Mohali, Punjab 140306,

11    India.

12    Telefax: 91 172 2240266, 91 172 2240124

13    \*Corresponding Author.

14    <sup>#</sup>Equal contribution authors.

## 15    **Abstract**

16    Promiscuity can drive the evolution of sexual conflict before and after mating occurs. Post-  
 17    mating, the male ejaculate can selfishly manipulate female physiology leading to a chemical  
 18    arms race between the sexes. Theory suggests that drift and sexually antagonistic coevolution  
 19    can cause allopatric populations to evolve different chemical interactions between the sexes,  
 20    thereby leading to post mating reproductive barriers and speciation. There is, however, little  
 21    empirical evidence supporting this form of speciation. We tested this theory by creating an  
 22    experimental evolutionary model of *Drosophila melanogaster* populations undergoing  
 23    different levels of interlocus sexual conflict. We found that sexual conflict can cause  
 24    reproductive isolation in allopatric populations through the co-evolution of chemical (post  
 25    mating prezygotic) as well as behavioural (pre-mating) interaction between the sexes. Thus,  
 26    to our knowledge, we provide the first comprehensive evidence of post mating (as well as pre  
 27    mating) reproductive barriers due to sexual conflict.

## 28 **Introduction:**

29 In most promiscuous species, males and females have differential reproductive investment  
30 and, consequentially differential evolutionary interest in the outcome of sexual interactions  
31 [1, 2]. This often leads to a scenario where adaptations benefitting one sex come at the expense  
32 of the other [3-5], ensuing a co-evolutionary chase typically called sexually antagonistic  
33 coevolution (SAC) [6]. According to verbal [7, 8] and formal [9, 10] arguments, SAC can  
34 lead to perpetual arms race between males and females of the same species. A byproduct this  
35 is the continual divergence between allopatric populations in genes related to reproduction,  
36 leading to reproductive isolation (RI) even in the absence of natural selection. This  
37 hypothesis is supported indirectly, by comparative studies that showed higher rates of  
38 speciation in insect clades with sexual conflict than those without [11]. However, no such  
39 evidence is found in other studies on mammals, butterflies, spiders [12] and birds [13].

40 An alternative to phylogenetic analysis that has been used to directly test the hypothesis is  
41 through experimental evolution which generally follows a simple experimental design:

- 42 a. Evolving independent replicate (i.e., allopatric) populations maintained under high  
43 and low/no conflict regimes (e.g., by enforcing monogamy or altering sex ratio) while  
44 all else remains equal.
- 45 b. Thereafter quantifying RI between allopatric populations within a regime and  
46 comparing the extent of isolation between different regimes.

47 As per the hypothesis, then, upon secondary contact allopatric populations will show  
48 evidence of RI that is relatively stronger, if not detectable only within the high conflict  
49 regime. Martin and Hosken tested the hypothesis in *Sepsis cynipsea* by evolving replicate  
50 populations under polygamy (SAC) and monogamy (removal of SAC) for 35 generations.  
51 They found that allopatric pairs showed significantly less mating success compared to their  
52 sympatric counterparts in the polygamous, but not in monogamous regime, thus providing the

53 first evidence that antagonistically evolving behavioral traits can lead to reproductive  
54 isolation [14].

55 Along with pre-mating behavioral interactions, post-mating chemical interactions are  
56 important players in driving SAC. Ejaculate-female interaction and subsequent coevolution  
57 has been shown to have caused diversification in both ejaculate components (e.g. sperm,  
58 accessory gland proteins, small molecules transferred through ejaculate) and female  
59 reproductive tract and behavior across taxa [15]. Thus, post-mating antagonistic coevolution  
60 can lead to post-mating RI through an ‘assortative sperm/ejaculate choice’ process that is  
61 analogous to assortative mate choice. However, there is no empirical evidence favouring this.  
62 Despite multiple studies testing the hypothesis in different organisms, the study by Martin  
63 and Hosken remains the only direct evidence of SAC as a driver of RI so far [16-20], and the  
64 idea of sexual conflict as an ‘engine of speciation’ remains controversial [21].

65 We used two sets of allopatric populations of *Drosophila melanogaster* – one set (three  
66 populations) evolving under male biased (M) operational sex ratio and the other set (of three  
67 populations) evolving under female biased (F) operational sex ratio, demonstrating high and  
68 low levels of SAC respectively [4,5]. We tested whether reproductive isolation between  
69 allopatric populations was more prominent, if not present only in M as compared to F regime.

70 Reproductive isolation can manifest in three stages: premating, postmating prezygotic and  
71 postzygotic isolating barriers [22]. We have focused on the first two as they are expected to  
72 evolve rapidly and have greater chance of being manifested [7] within the relatively shorter  
73 time scale of experimental evolution.

74 As a measure of premating isolation, we assayed (a) assortative mating between females and  
75 males from the same population in presence of a competitor male from a different population  
76 (within the same regime) and (b) female reluctance to mate. As for postmating prezygotic

isolation, we compared (a) copulation duration and (b) competitive fertilization success of males from within and across population crosses.

We found evidences of both premating and postmating prezygotic RI between populations in M regime but not in F, prompting us to conclude that sexual conflict can indeed act as ‘an engine of speciation’.

## Results:

The selection lines were derived from a long term laboratory adapted population of *Drosophila melanogaster* called LH<sub>st</sub>[24]. The LH<sub>st</sub> population, in turn was derived by the introgression of an autosomal ‘scarlet eye’ (st) mutation to another large laboratory bred population called LH (see methods for further description of ancestral populations).

Each of the three independent replicates of male biased regime (M<sub>1,2,3</sub>) and female biased regime (F<sub>1,2,3</sub>) were created by altering the sex ratio to 1:3::female: male and 3:1::female: male respectively(23). All assays were done between the 95<sup>th</sup> and 105<sup>th</sup> generations of selection.

Males and females used in the assays were either from the same replicate population or from different replicate populations within a regime, which we term as ‘within replicate’ (WR) and ‘between replicate’ (BR) respectively. Flies used for all the assays were collected as virgins and a held singly in vials (90-mm length × 30-mm diameter) containing fresh corn meal - yeast- molasses food. All flies were 2-3 day-old adults at the time of assay.

## Assay for premating isolation:

To look for pre-mating reproductive isolation though assortative mating, we combined a virgin female with a WR and a BR virgin male (simultaneously) in a round-robin manner and observed which one of the two males mated with the female(Table 1). A binomial test for each of the combinations displayed evidence of positive assortative mating (i.e., proportion of

successfully mated WR males was significantly higher than random mating expectancy of 0.5) for all three replicates of the M regime, while none of the F regime showed the same (Table 2). A t-test comparing selection regimes for the three replicates also shows that WR males have significantly higher competitive mating success in M than in F ( $p = 0.02$ , Table 2). This suggests pre-mating reproductive isolation between allopatric in the M regime. However, another measure of pre-mating isolation, mating latency (time taken for a pair to start mating after they are combined) showed no evidence of reproductive isolation (two way ANOVA:  $F_{1,226} = 1.679$ ,  $p = 0.614$ ; One way ANOVAs:  $F_{1,116} = 0.0104$ ,  $p = 0.9188$  and  $F_{1,109} = 0.4874$ ,  $p = 0.4866$  respectively; Fig S1, S2, S3).

**Table 1: Mating treatments for different assays. The letters i and j denote block (replicate) numbers,  $i \neq j$  (in a round robin way). All mating trials were conducted within a selection regime.**

| Assay                                                      | Female from block | Male from block    | Sample size |
|------------------------------------------------------------|-------------------|--------------------|-------------|
| Assortative mating                                         | i                 | i(pink) + j(green) | 30          |
|                                                            |                   | j(green) + i(pink) | 30          |
| Mating latency, copulation duration, Sperm defence ability | i                 | i                  | 20          |
|                                                            | j                 | j                  | 20          |

**Table 2: Results of the assay for assortative mating show that in M regime, assortative mating happens favouring WR males and females- compared to random expectation (binomial test) and F regime (t test).**

117 'k (success)' denotes number of successful mating between WR males and females out of  
 118 n trials performed in each category. The 'binom prob' shows the probability of finding  
 119 k successes out of n trials if matings were random (success probability = 0.5). We  
 120 considered a probability of <0.05 to be significant. The 't test results' column depicts t  
 121 test results comparing the proportion of successful WR males in F and M regime.  
 122 Proportion of successful WR male was arcsine square-root transformed to meet the  
 123 assumptions of parametric analysis.

| SelReg | Block | k(success) | n(trials) | binom prob<br>(p=0.5) | Arcsinesqrt<br>(prop.success) | t test results                                                  |
|--------|-------|------------|-----------|-----------------------|-------------------------------|-----------------------------------------------------------------|
| F      | 1     | 26         | 56        | 0.092238              | 0.749653                      | t Ratio =<br>3.79607<br>DF = 4<br>Prob> t =0.02<br>Prob> t=0.01 |
| F      | 2     | 18         | 56        | 0.002947              | 0.636217                      |                                                                 |
| F      | 3     | 28         | 58        | 0.10084               | 0.768153                      |                                                                 |
| M      | 1     | 33         | 56        | 0.043955              | 0.87139                       |                                                                 |
| M      | 2     | 33         | 54        | 0.028885              | 0.949017                      |                                                                 |
| M      | 3     | 34         | 58        | 0.044521              | 0.872038                      |                                                                 |

124

## 125 Assay for post-mating prezygotic isolation:

126 To test for post-mating prezygotic isolation, we first measured copulation duration (the time  
 127 spent *in-copula* by a mating pair). Within each selection regime we had two treatments where  
 128 one virgin female was combined with either one virgin BR or one virgin WR male. We had

60 replicate vials per treatment (WR/BR) per selection regime (M/F) for this experiment (table1).

In a two way ANOVA using treatment and selection as fixed factors, we found a significant selection regime  $\times$  treatment interaction ( $F_{1, 226} = 4.269$ ,  $p = 0.04$ , Fig 2). Both Tukey's HSD and one way ANOVAs performed separately on the two selection regimes using treatment as a fixed factor showed that in F, there was no difference in copulation duration ( $F_{1,116} = 0.022$ ,  $p=0.883$ )(Fig S3) but in M, copulation duration was significantly higher in WR crosses compared to BR crosses ( $F_{1,109} = 8.834$ ,  $p=0.003$ )(Fig S4).

**Fig1. Figure1: Mean copulation duration ( $\pm$ S.E) of WR and BR treatments from female biased (F) regime male biased (M) regimes based on the results of two-way ANOVA.**

Points not sharing common letter (e.g., A and B) are significantly different based on Tukey's HSD.

The difference in copulation duration was an indication of incipient reproductive isolation in terms of reproductive behavior. We have previous evidence that in the ancestral population, copulation duration of the first mating is positively correlated with sperm defense ability [25]. So we tested if such behavioral change translates into fitness difference. Sperm defense ability (P1) is measured as the proportion of progeny sired by the first male when the female is mated with multiple males (typically two males for assay purposes). A two way ANOVA similar to that of mating latency and copulation duration showed a significant selection regime  $\times$  treatment interaction ( $F_{1, 311}=3.981$ ,  $p = 0.046$ , Fig 3). Both Tukey's HSD and one way ANOVAs performed separately on the two selection regimes using treatment as a fixed factor showed that in F, P1 of WR and BR males were not different ( $F_{1,170} = 0.0199$ ,  $p=0.8879$ ) (Fig S5) but in M, WR males had significantly higher P1 value compared to that of the males from BR crosses ( $F_{1,143} = 9.0121$ ,  $p=0.0032$ )(Fig S6). This indicates that the difference in mating behavior also translates into fitness differences.



**Fig2. Mean (arcsine square root transformed) p1 ( $\pm$ S.E) of WR and BR treatments from female biased (F) regime male biased (M) regimes based on the results of two-way ANOVA. Points not sharing common letter (e.g., A and B) are significantly different based on Tukey's HSD.**

## **Discussion:**

In this study, we used experimental evolution to show that high levels of SAC can lead to the evolution of early stages of reproductive isolation at (a) premating and (b) postmating prezygotic stages in populations of *Drosophila melanogaster*.

a. **Premating isolation:** We found that in populations under high sexual conflict (M), females mated primarily with males of the same population in presence of an allopatric competitor from the same regime. Populations under low sexual conflict (F), on the other hand, display no such trend. Our observations corroborate that of Martin and Hosken [14], who found evidences of premating isolation in dung fly populations maintained under promiscuous (but not in monogamous) conditions. However, unlike them, we did not find any difference in females' reluctance to mating (measured as mating latency in our study) under non-competitive scenario. This could be due to the fact that we used virgin females in our assay and there exist little variation in their reluctance to mate, as has been seen in previous studies testing the same hypothesis [14, 16-20]. Alternatively, in the M populations SAC might have created genetic divergence which manifests only under a choice scenario where females get spotted faster and/or courted more vigorously by WR males or simply find WR males more attractive than their BR counterparts. Thus, we provide evidence that premating RI can manifest itself under competitive scenario in terms of *mate choice* behavior in addition to/instead of failed mating or 'reluctance to mate' behavior – a possibility that has largely been neglected by most previous studies [16-19]. However, Plesnar-Bielak et al address this possibility but find no effect of SAC on assortative mating in the bulb mite *Rhizoglyphus*

*robini*, after maintaining them under monogamous or polygamous regimes for 45 generations [20].

b. **Postmating Prezygotic RI:** Our assays resulted in WR pairs mating for longer and males enjoying greater sperm defense ability (when competed with common baseline males) than their BR counterparts in M populations but not in F. Thus in these populations SAC seems to have resulted in postmating prezygotic RI between allopatric populations.

Copulation duration is an important indicator of male ejaculate investment as well as cryptic male mate choice [30, 31]. In a similar study on *Drosophila pseudoobscura*, Bacigalupe et al used copulation duration as a one of the measures of reproductive isolation. In that, they evolved populations under different intensities of SAC and compared difference in copulation duration (among other traits) between WR and BR crosses. They found significant difference only in the regime with the highest SAC intensity, where WR crosses had lower copulation duration than BR crosses [18]. Our result is in stark contradiction to that. Copulation duration has also been used as an indicator of reproductive isolation in speciation studies on several *Drosophila* species complexes [26-28]. In all the studies, individuals from sister species did mate but, at least in some cases heterospecific matings had lower copulation duration than conspecific matings. Our results could represent an early stage of speciation in this regard. Lower copulation duration in BR mating compared to WR mating in M populations could be due to genetic divergence caused by SAC that leads to reduced ejaculate transfer ability and/or cryptic male investment by the males when they mate with allopatric females.

A number of studies - while testing if SAC drives reproductive isolation using experimental evolution - have measured post-mating isolation extensively in terms of difference in fecundity [17], offspring number [19, 20], offspring viability [17, 18] or offspring sterility [18], but found no evidence of isolation in those traits. An important area where RI can be manifest is competitive fertilization success [8] which none of the studies thus far has addressed. We find that M males have lower competitive fertilization success when

competition happens in BR females than when it does in WR females, while in F males there is no such difference. Since in these populations it was not possible to assay direct sperm competition between BR and WR males, we have used a proxy measure where all the competitor males used in these assays were taken from the same ancestor population with the assumption that relative sperm competitive ability of the common competitors do not differ across replicate populations within a regime. This is a valid assumption since in a previous study comparing sperm competitive ability of M and F males (where we used the same common competitors) we found no replicate effect [23].

There are at least two reasons why M males have reduced sperm competitive ability when mated with allopatric M females. First, it could be a direct correlate of decreased copulation duration. Males with lower copulation duration do not/cannot transfer as much ejaculate and therefore have lower competitive ability [29]. The copulation duration-competitive ability correlation has been demonstrated in the ancestral population from which the selected populations have been derived [25]. Second, it could be a putative stage of conspecific sperm precedence (CSP) –where sperm of conspecific male has greater competitive success over that of heterospecific male. Evidence of CSP is widespread across various taxa [30-33] and its mechanisms have been illustrated for at least one set of *Drosophila* sibling species [32, 33]. In *Drosophila melanogaster* (as in most promiscuous species) females mate multiple times and often store ejaculate (in specialized storage organs, e.g., seminal receptacle and spermatheca in fruit flies) from different males where they compete for fertilization success. The outcome is mostly determined by how the resident ejaculate (from an earlier mating) is displaced from female storage organs by ejaculate from more recent mating [34] and is influenced by competing males and host female [35]. This provides ample scope for sperm-female coevolution [36]. Since at least some accessory gland proteins are harmful to females, ejaculate- female coevolution should be antagonistic in nature. Thus it is possible that increased postmating SAC drove divergence in replicate M populations in terms of how

ejaculate and female reproductive tract interact to determine fertilization success leading to an incipient form of CSP. Thus, our results show higher rates of SAC can drive reproductive isolation in allopatric populations through reduced post-mating competitive success of males. Out of all the studies that have used experimental evolution to test the theoretical prediction that sexually antagonistic coevolution can drive reproductive isolation, there are only two (including the present one) that provide evidence in support, and to the best of our knowledge, this is the only one that provides evidence of post-mating isolation. There are multiple reasons as to why our results differ from most of its predecessors [16-20]:

- a. The census population size for each replicate was bigger in our study than those of the previous ones.
- b. The number of generations in those studies were too low (our assays were done after ~100 generations of selection compared to that of  $\leq 50$  in all of the previous studies) to allow SAC to drive population divergence to a degree where they are apparent.
- c. According to theoretical predictions, reproductive isolation in allopatric populations is one of the six possible outcomes of sexual conflict [9]. It is possible that the populations under high SAC in those studies did not diverge with respect to each other. However, none of the studies shed light upon any of the other five possibilities that might have occurred in their populations.

In conclusion, we show direct evidence of evolution of both premating and postmating prezygotic RI as a consequence of SAC. Thus, it remains a distinct possibility that sexual conflict can result in a coevolutionary chase between the sexes [11, 37] and can indeed be ‘an engine of speciation’. We speculate that initial genetic variation and number of generations can be important to realize – at least in experimental evolution studies – the evolution of RI caused by sexual conflict. However we also feel the need of more such

studies to experimentally determine the exact conditions under which sexual conflict acts as ‘an engine of speciation’ and to elucidate the underlying proximate mechanisms.

## **Methods:**

### **Ancestral Populations:**

LH – It is a large laboratory adapted population of *Drosophila melanogaster*, established by, and named after Lawrence G Harshman. The population is maintained on a 14 day discrete generation cycle, under 25°C, 60-80% relative humidity, 12 hours light / 12 hours dark (12hrs: 12hrs L/D cycle) and on standard cornmeal – molasses – yeast food. The flies are grown under moderate larval density of 140-160 per 8-dram vial (25mm diameter × 90mm height) containing 8-10ml food. On the 12<sup>th</sup> day post egg collection, flies from different vials are mixed and redistributed across fresh food vials containing limiting amount of live yeast grains with 16 males and 16 females per vial. On the 14<sup>th</sup> day, flies are transferred to fresh vials and are allowed a window of 18 hours to lay eggs which (after discarding the adults and controlling density) start the next generation (38).

LH<sub>st</sub> –this population was derived by introducing the scarlet eye colour (recessive, autosomal and benign) gene into the LH population, hence the subscript. LH<sub>st</sub> is maintained under the same condition as LH with N<sub>e</sub>>2500. The genetic backgrounds of these two populations are homogenized by periodic back crossing.

### **Selection Regimes:**

The study was done on six populations of *Drosophila melanogaster* – M<sub>1-3</sub> and F<sub>1-3</sub> representing male biased and female biased operational sex ratio respectively. All these populations were created from the LH<sub>st</sub> population.

We derived the male biased ( $M_{1-3}$ ) and female biased ( $M_{1-3}$ ) regimes, each having three independent replicates, from  $LH_{st}$  by varying the operational sex ratio to male: female :: 3:1 and 1:3 respectively. The maintenance of these populations differs from that of  $LH/LH_{st}$  in the following ways:

(a) In these populations adult flies are collected as virgins 9-10 days after egg collection, during the peak eclosion period and held in vials (containing 8 flies of one sex) for two days.

(b) The sexes are combined on the 12<sup>th</sup> day in fresh food vials seeded with measured amount of live yeast (0.47mg per female) following the selection regime – 24males+8females in each vial for M and 8males+24females in each vial for F.

The effective population sizes of all the populations are maintained at > 450 or >350 depending on the method used to calculate them (4). For more details on the evolutionary history and detailed maintenance protocol, see (23).

### **Standardization and Generation of Experimental Flies:**

In order to equalize the potential non-genetic parental effects across different regimes, we maintained all populations under ancestral condition which does not include virgin collection and sex ratio alteration- essentially following the same life cycle as  $LH_{st}$  populations for one generation before obtaining individuals for the experiment. This process is called standardization (39).

Eggs laid by the standardized flies were collected to at a density of 150( $\pm$ 2) per vial (containing 8-10ml of cornmeal food) obtain the experimental flies. On the 10<sup>th</sup> day after egg collection, males and females were collected as virgins during the peak of their eclosion and held as single individual per vial.

Ancestral flies (LH), whenever they were used in this study, were raised in similar conditions. LH males were sorted on the 12<sup>th</sup> day post eclosion and held as single individuals. Eggs for LH flies were collected on the same day as that of the selection lines. Thus the age of the experimental flies of all the populations were same during the experiment.

### **General Experimental Design:**

For all our assays, we compared reproductive behavior and/or fitness related traits between two types of individuals within a regime:

- a. Within replicate (WR): These are individuals from the same replicate number of a given selection regime i.e.,  $M_i\sigma$  and  $M_i\phi$  are WR with respect to each other where  $i$  denotes the replicate number (e.g.,  $M_1\sigma$  and  $\phi$ ) and similarly for F.
- b. Between replicate (BR): These are individuals from different replicate numbers of a given selection regime, i.e.,  $M_i\sigma$  and  $M_j\phi$  are BR with respect to each other –where  $i$ ,  $j$  denote replicate numbers and  $(i,j) \in \{(1,2), (2,3), (3,1)\}$  (e.g.  $M_1\sigma$  and  $M_2\phi$ ) and similarly for F. We took BR individuals in a round robin manner to avoid the problem of pseudo-replication (21).

### **Assay for Assortative Mating:**

We combined a virgin female with two virgin males from the same selection regime –one WR and one BR – in vials containing fresh food. That is, a female from a given replicate number was combined with a male from the same replicate number and another from a different replicate number (all within the same selection regime), e.g., one  $M_1$  female + one  $M_1$  male + one  $M_2$  male and so on. Thus we had three combinations within each selection regime, denoted by female replicate number. Males were marked by pink or green Day-Glo

dust for identification. Previous studies using the same dust found no adverse effect on individuals (40). However, to account for any mating bias brought about solely by green and/or pink coloration, we had reverse coloration treatments for all combinations. Thus each combination had two treatments, e.g., one  $M_1$  female + one green  $M_1$  male + one pink  $M_2$  male; one  $M_1$  female + one pink  $M_1$  male + one green  $M_2$  male and so on. We had 30 replicate vials per combination per colour treatment (table1). In some vials we observed no mating till one hour after combining the flies. Those vials were discarded and excluded from analysis (the final sample sizes are listed in table 2 under the column ‘n (trials)’).

### **Assay for Mating Latency and Copulation Duration:**

For this assay we combined one virgin male and one virgin female according to treatment (WR or BR, see results) in a vial containing fresh food. After combining a male and a female, the pair was observed till they finished mating. Time taken for a pair to start mating after they were combined was recorded as mating latency and the time they spent in-copula was recorded as copulation duration. If a pair failed to mate after one hour, they were discarded. However, the number of failed mating in all treatments was very low (6, 3, 0 and 3 failures out of 60 trials in M-WR, M-BR, F-WR and F-BR respectively). Mating latency and copulation duration values for each vial were used as the unit of replication.

### **Assay for Competitive fertilization success:**

As a measure of competitive fertilization success, we measured sperm defense ability of males, the rationale for which is provided in the results section. For assaying sperm defense ability, we set up crosses following the same method as mentioned above and the vials were observed for mating for one hour. The females that did not mate with the first male were discarded. After the first mating, we sorted the females using light  $CO_2$ -anaesthesia and held them back into the vials and discarded the males. After allowing a recovery time (from



anesthesia) of half an hour, we introduced a second male (red eyed, LH) in each vial and kept the vials undisturbed for 24 hours, during which they could mate with the females. After this exposure window, the second males were discarded and the females were transferred singly (under light anesthesia) to test tubes (dimensions: 12 mm diameter  $\times$  75 mm length) provisioned with food. There they were allowed an oviposition window of 18 hours. The adult progeny emerging from the eggs laid during this window were scored for their eye colour marker after 12 days. The proportion of scarlet progeny was taken as an estimate of P1 of the male. 90 males from each of the crosses were assayed for P1. Since we did not observe the second mating, instances where all progeny was sired only by the first male (P1=1) could arise due to second male failing to mate. Such instances were excluded from the analysis. Final sample size for P1 analysis was n=83-87 and 70-73 per cross type (WR/BR) in F and M populations respectively. P1 value from a single vial was used as the unit of replication.

### **Statistical Analysis:**

To test for assortative mating, we used two different statistical analyses. First, we defined each mating as a “trial”: and a female mating with WR male as “success” and used a binomial test with the assumption that both the males are equally likely to mate, i.e.,  $p=0.5$ . If the probability of finding  $k$  successes out of  $n$  trials under this assumption was  $<0.05$ , we rejected the null hypothesis. We did this for each of the six combinations (2 selection regimes  $\times$  3 combinations each). Second, we calculated proportion of WR mating in each of the replicates, resulting in 3 values for M and F each and compared them using Student’s t-test. The proportion values were arcSine Square-root transformed to meet the assumptions of parametric test.

For the rest of the assays, we performed a two-way ANOVA with selection regime and treatment (type of individuals involved in a cross: BR/WR) as fixed factors to test whether there was any interaction between the two factors in the measured observables. A significant interaction with greater isolation in M than in F would indicate presence of RI (*a la* 14, 16). We also performed one-way ANOVAs separately on the same data, but separately for each selection regime. The objective was to test whether WR and BR crosses differed in M populations or not. The F populations served as a control where it was expected that there would be no isolation (*a la* 18). We would like to point out here that the results remain quite robust and indicate to the same inference no matter which method is used to analyze the data.

# **Acknowledgement:**

The authors would like to thank Dr Bodhisatta Nandy, Dr Vanika Gupta, Ms Sharmi Sen, Prof. Amitabh Joshi, Prof. Adam K Chippindale, Mr Sudipta Tung, Dr Sutirth Dey and Dr TNC Vidya for helpful discussions and comments on the manuscript; Mr Tejinder Singh Chechi for help in population maintenance; numerous undergraduate and masters' students of IISER Mohali for help in data collection.

# **References:**

1. Parker GA. Sexual selection and sexual conflict. Sexual selection and reproductive competition in insects. 1979:123-66.
2. Arnqvist G, Rowe L. Sexual conflict. Princeton University Press; 2013 Nov 28.
3. Rice WR. Sexually antagonistic male adaptation triggered by experimental arrest of female evolution. Nature. 1996 May 16;381(6579):232-4.

4. Nandy B, Gupta V, Sen S, Udaykumar N, Samant MA, Ali SZ, Prasad NG. Evolution of mate-harm, longevity and behaviour in male fruit flies subjected to different levels of interlocus conflict. BMC evolutionary biology. 2013 Sep 28;13(1):1.

5. Nandy B, Gupta V, Udaykumar N, Samant MA, Sen S, Prasad NG. Experimental evolution of female traits under different levels of intersexual conflict in *Drosophila melanogaster*. Evolution. 2014 Feb 1;68(2):412-25.

6. Rowe L, Arnqvist G. Sexually antagonistic coevolution in a mating system: combining experimental and comparative approaches to address evolutionary processes. Evolution. 2002 Apr 1;56(4):754-67.

7. Parker GA, Partridge L. Sexual conflict and speciation. Philosophical Transactions of the Royal Society of London B: Biological Sciences. 1998 Feb 28;353(1366):261-74.

8. Rice WR, Linder JE, Friberg U, Lew TA, Morrow EH, Stewart AD. Inter-locus antagonistic coevolution as an engine of speciation: assessment with hemiclinal analysis. Proceedings of the National Academy of Sciences. 2005 May 3;102(suppl 1):6527-34.

9. Gavrillets S, Hayashi TI. Speciation and sexual conflict. Evolutionary Ecology. 2005 Mar 1;19(2):167-98.

10. Gavrillets S. Rapid evolution of reproductive barriers driven by sexual conflict. Nature. 2000 Feb 24;403(6772):886-9.

11. Arnqvist G, Edvardsson M, Friberg U, Nilsson T. Sexual conflict promotes speciation in insects. Proceedings of the National Academy of Sciences. 2000 Sep 12;97(19):10460-4.

12. Gage MJ, Parker GA, Nylin S, Wiklund C. Sexual selection and speciation in mammals, butterflies and spiders. Proceedings of the Royal Society of London B: Biological Sciences. 2002 Nov 22;269(1507):2309-16.

- 415 13. Morrow EH, Pitcher TE, Arnqvist G. No evidence that sexual selection is an ‘engine  
416 of speciation’ in birds. *Ecology Letters*. 2003 Mar 1;6(3):228-34.
- 417 14. Martin OY, Hosken DJ. The evolution of reproductive isolation through sexual  
418 conflict. *Nature*. 2003 Jun 26;423(6943):979-82.
- 419 15. Pitnick S, Wolfner MF, Suarez SS. Ejaculate-female and sperm-female interactions.  
420 Sperm biology: an evolutionary perspective. 2009:247-304.
- 421 16. Wigby S, Chapman T. No evidence that experimental manipulation of sexual conflict  
422 drives premating reproductive isolation in *Drosophila melanogaster*. *Journal of evolutionary*  
423 *biology*. 2006 Jul 1;19(4):1033-9.
- 424 17. Gay L, Eady PE, Vasudev R, Hosken DJ, Tregenza T. Does reproductive isolation  
425 evolve faster in larger populations via sexually antagonistic coevolution?. *Biology letters*.  
426 2009 Oct 23;5(5):693-6.
- 427 18. Bacigalupe LD, Crudginton HS, Hunter F, Moore AJ, Snook RR. Sexual conflict  
428 does not drive reproductive isolation in experimental populations of *Drosophila*  
429 *pseudoobscura*. *Journal of evolutionary biology*. 2007 Sep 1;20(5):1763-71.
- 430 19. Michalczyk L. Sexual selection and reproductive compatibility in *Tribolium*  
431 *castaneum* (Doctoral dissertation, University of East Anglia).
- 432 20. Plesnar-Bielak A, Skrzynecka AM, Prokop ZM, Kolasa M, Działo M, Radwan J. No  
433 evidence for reproductive isolation through sexual conflict in the bulb mite *Rhizoglyphus*  
434 *robini*. *PloS one*. 2013 Sep 19;8(9):e74971.
- 435 21. Tregenza T, Wedell N, Butlin RK. Speciation and sexual conflict. *Nature*.  
436 2000;407:149-50.
- 437 22. Coyne JA, Orr HA. Speciation. Sunderland, MA: Sinauer Associates; 2004.

- 438        23. Nandy B, Chakraborty P, Gupta V, Ali SZ, Prasad NG. Sperm competitive ability  
439 evolves in response to experimental alteration of operational sex ratio. *Evolution*. 2013 Jul  
440 1;67(7):2133-41.
- 441        24. Nandy B, Chakraborty P, Gupta V, Ali SZ, Prasad NG. Sperm competitive ability  
442 evolves in response to experimental alteration of operational sex ratio. *Evolution*. 2013 Jul  
443 1;67(7):2133-41.
- 444        25. Tanuja MT, Ramachandra NB, Ranganath HA. Incipient sexual isolation in the *nasuta*-  
445 *albomicans* complex of *Drosophila*: No-choice experiments. *Journal of biosciences*. 2001 Mar  
446 1;26(1):71-6.
- 447        26. Price CS, Kim CH, Gronlund CJ, Coyne JA. Cryptic reproductive isolation in the  
448 *Drosophila simulans* species complex. *Evolution*. 2001 Jan 1;55(1):81-92.
- 449        27. Coyne JA, Kim SY, Chang AS, Lachaise D, Elwyn S. Sexual isolation between two  
450 sibling species with overlapping ranges: *Drosophila santomea* and *Drosophila yakuba*.  
451 *Evolution*. 2002 Dec 1;56(12):2424-34.
- 452        28. Wigby S, Sirot LK, Linklater JR, Buehner N, Calboli FC, Bretman A, Wolfner MF,  
453 Chapman T. Seminal fluid protein allocation and male reproductive success. *Current Biology*.  
454 2009 May 12;19(9):751-7.
- 455        29. Howard DJ. Conspecific sperm and pollen precedence and speciation. *Annual Review*  
456 *of Ecology and Systematics*. 1999 Jan 1:109-32.
- 457        30. Price CS. Conspecific sperm precedence in *Drosophila*. *Nature*. 1997 Aug  
458 14;388(6643):663-6.

- 459        31. Manier MK, Lüpold S, Belote JM, Starmer WT, Berben KS, Ala-Honkola O, Collins  
460        WF, Pitnick S. Postcopulatory sexual selection generates speciation phenotypes in  
461        Drosophila. Current Biology. 2013 Oct 7;23(19):1853-62.
- 462        32. Manier MK, Lüpold S, Belote JM, Starmer WT, Berben KS, Ala-Honkola O, Collins  
463        WF, Pitnick S. Postcopulatory sexual selection generates speciation phenotypes in  
464        Drosophila. Current Biology. 2013 Oct 7;23(19):1853-62.
- 465        33. Manier MK, Belote JM, Berben KS, Novikov D, Stuart WT, Pitnick S. Resolving  
466        mechanisms of competitive fertilization success in Drosophila melanogaster. Science. 2010  
467        Apr 16;328(5976):354-7.
- 468        34. Clark AG, Begun DJ, Prout T. Female× male interactions in Drosophila sperm  
469        competition. Science. 1999 Jan 8;283(5399):217-20.
- 470        35. Lüpold S, Pitnick S, Berben KS, Blengini CS, Belote JM, Manier MK. Female  
471        mediation of competitive fertilization success in Drosophila melanogaster. Proceedings of the  
472        National Academy of Sciences. 2013 Jun 25;110(26):10693-8.
- 473        36. Miller GT, Pitnick S. Sperm-female coevolution in Drosophila. Science. 2002 Nov  
474        8;298(5596):1230-3.
- 475        37. Rice WR, Holland B. The enemies within: intergenomic conflict, interlocus contest  
476        evolution (ICE), and the intraspecific Red Queen. Behavioral Ecology and Sociobiology.  
477        1997 Jul 1;41(1):1-0.
- 478        38. Chippindale AK, Rice WR. Y chromosome polymorphism is a strong determinant of  
479        male fitness in Drosophila melanogaster. Proceedings of the National Academy of Sciences.  
480        2001 May 8;98(10):5677-82.

481        39. Rose MR. Laboratory evolution of postponed senescence in *Drosophila melanogaster*.  
482        Evolution. 1984 Sep 1:1004-10.

483        **40. Schroeder WJ, Mitchell WC. Marking Tephritidae fruit fly adults in **Hawaii** for**  
484        **release-recovery studies.**

485

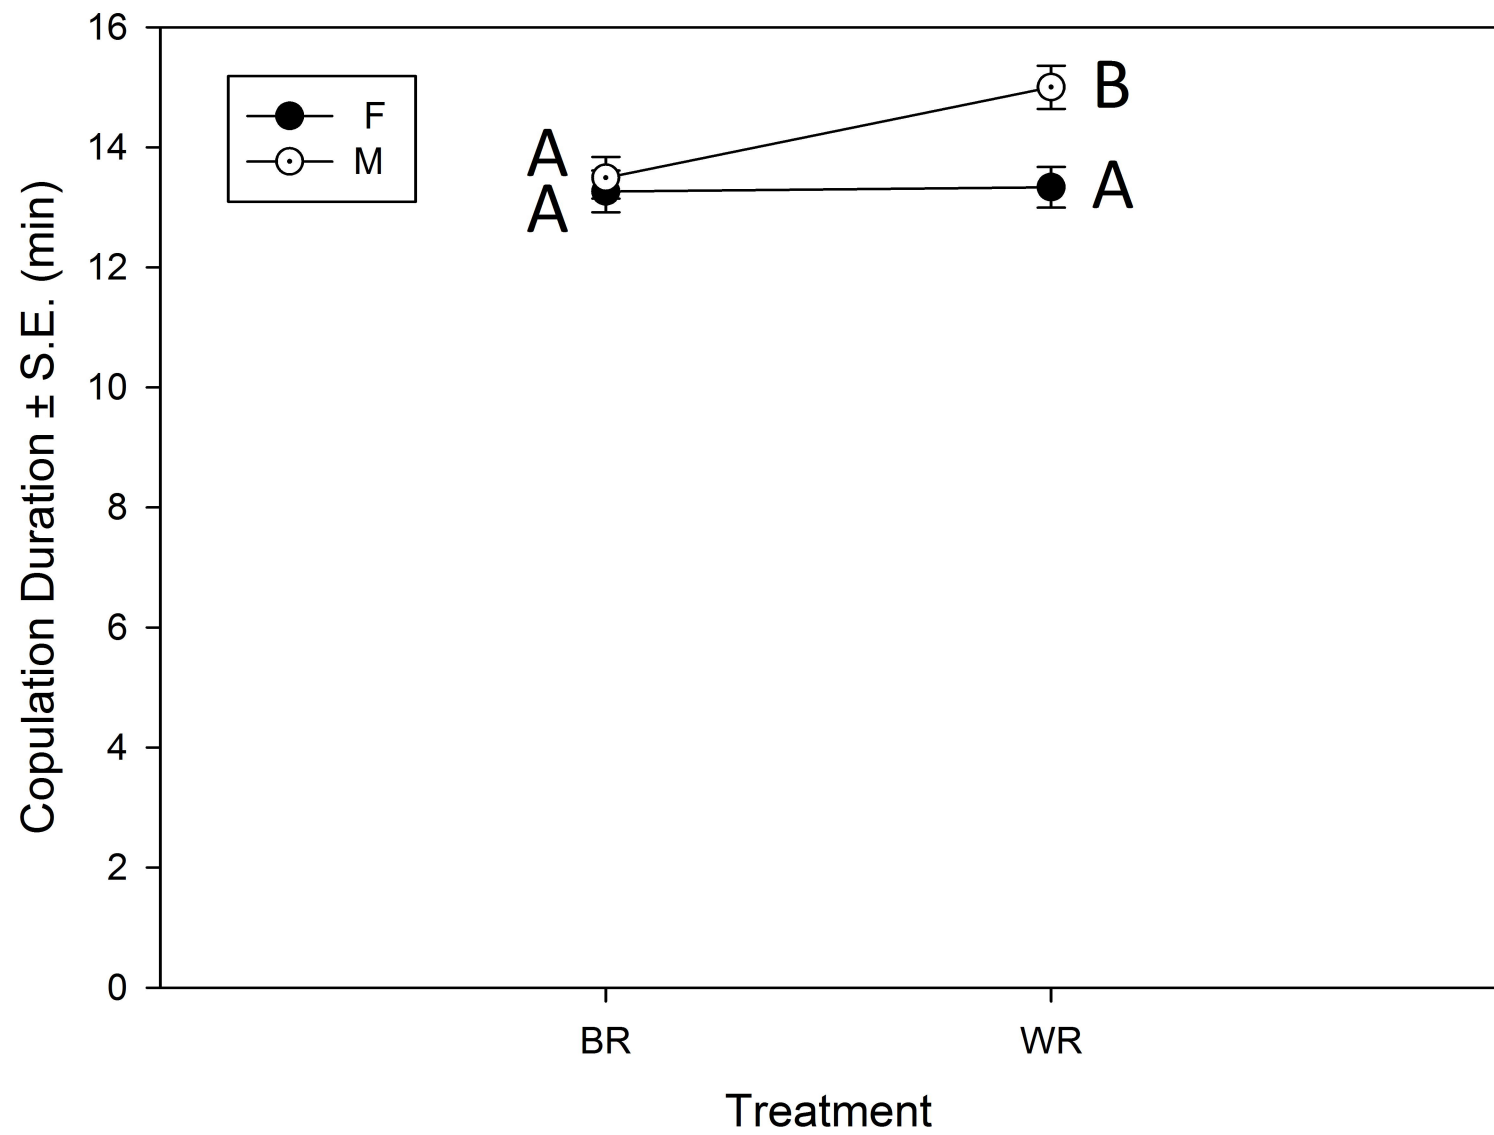



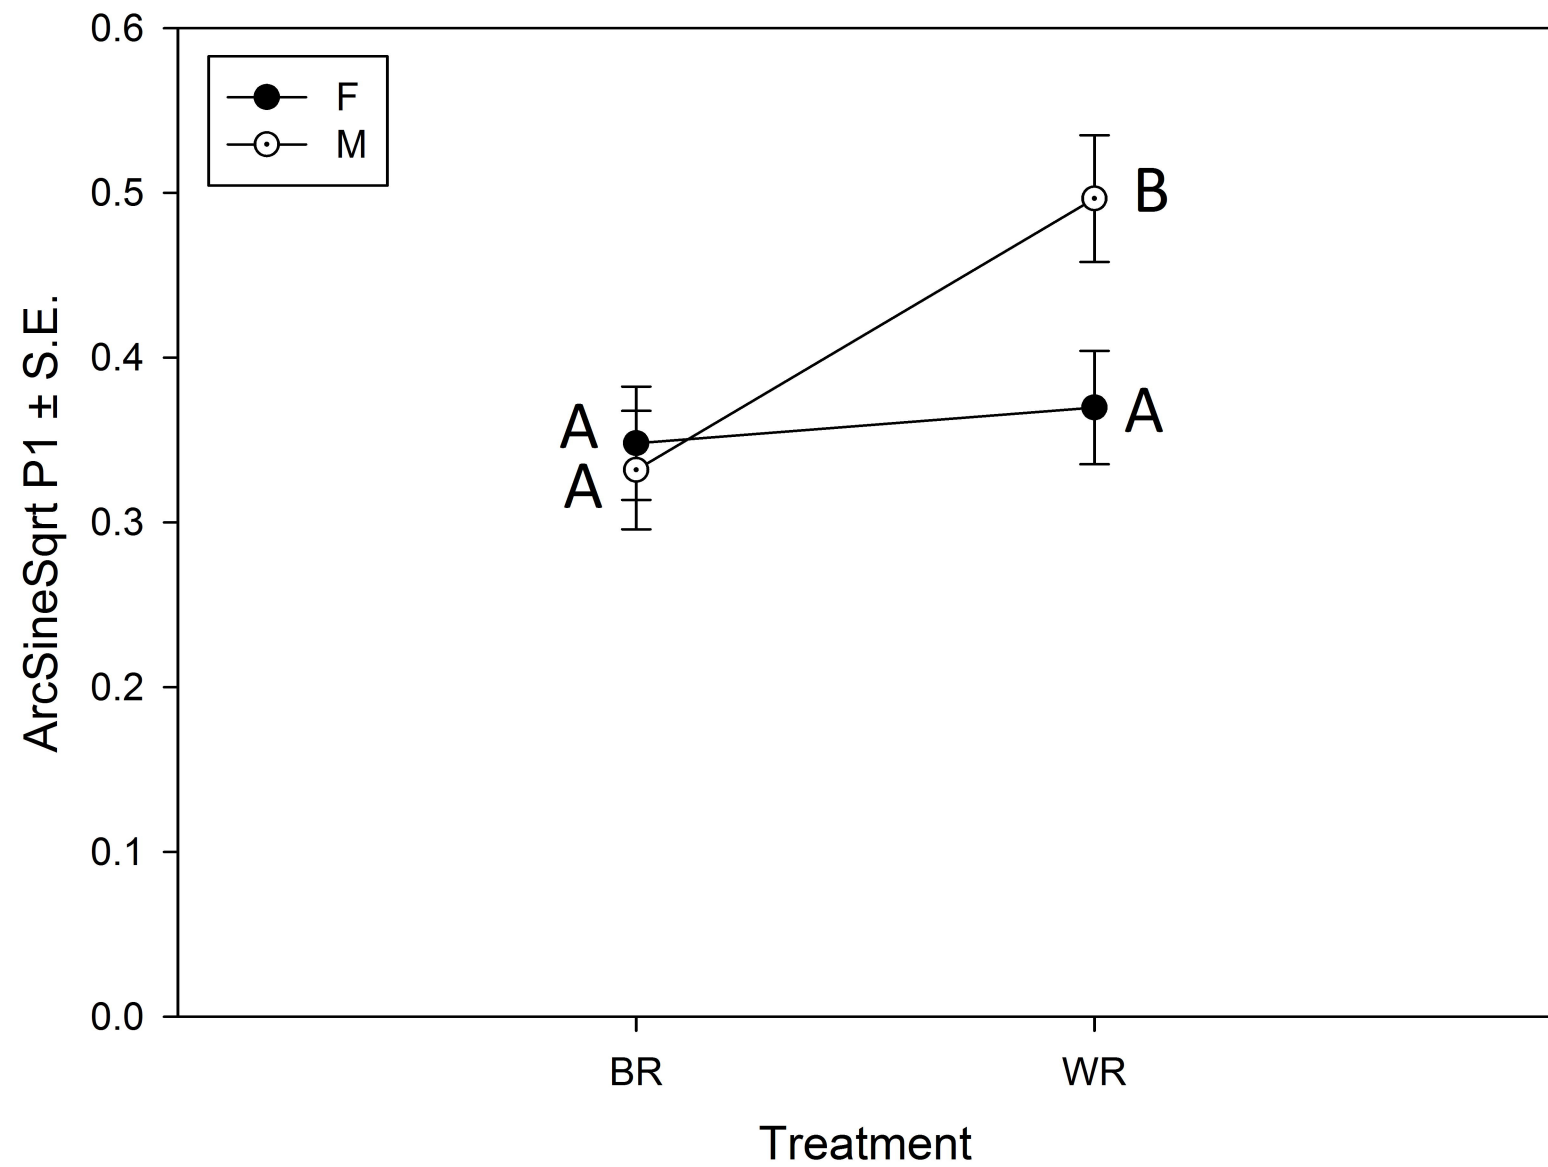

Source: http://biorxiv.org/content/10.1101/079657v1.full.pdf
